# Supplementary material for: Nanostructure changes in protic ionic liquids (PILs) through adding solutes and mixing PILs
Source: Royal Society of Chemistry journal article supplement (doi:10.1039/c1cp20496c), 2011-01-01
Supplement: c1cp20496c.pdf [file c1cp20496c.pdf]

# Nanostructure changes in protic ionic liquids (PILs) through adding solutes and mixing PILs

Tamar L. Greaves,<sup>a</sup> Danielle F. Kennedy,<sup>a</sup> Nigel Kirby,<sup>b</sup> Calum J. Drummond<sup>\*a</sup>

## Electronic Supplementary Information

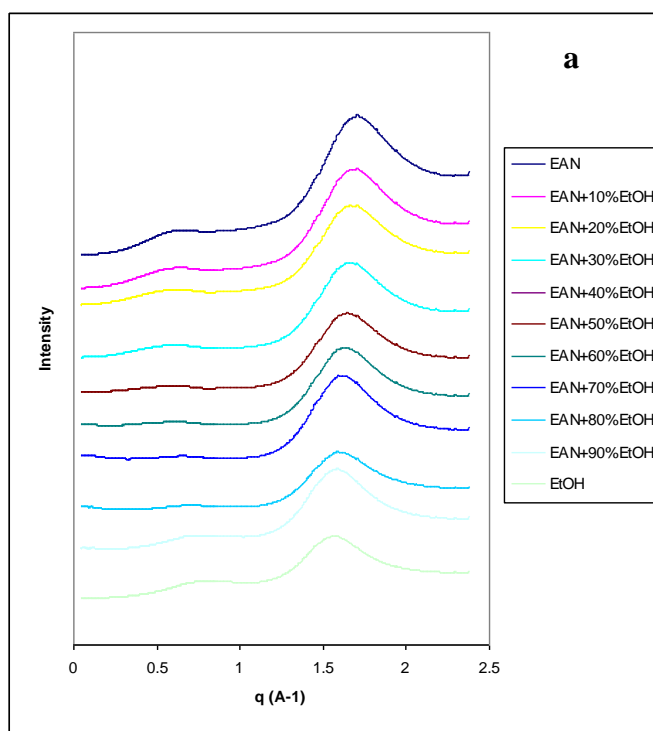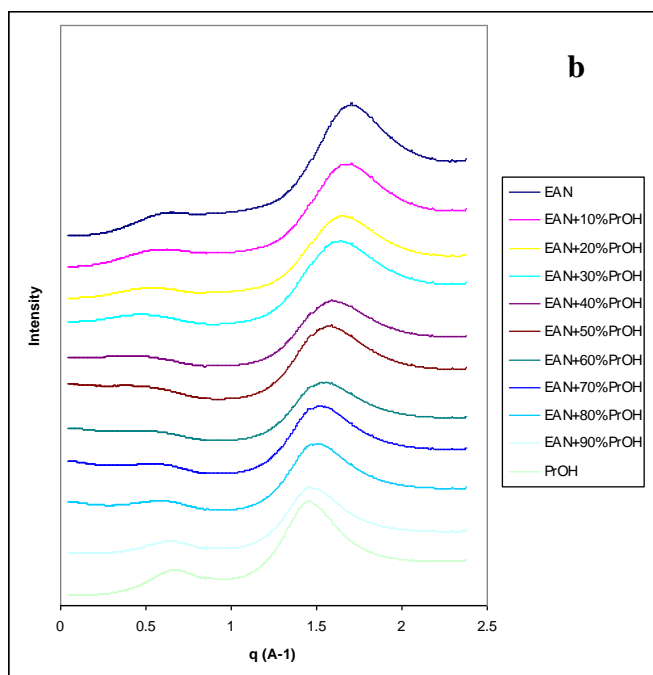

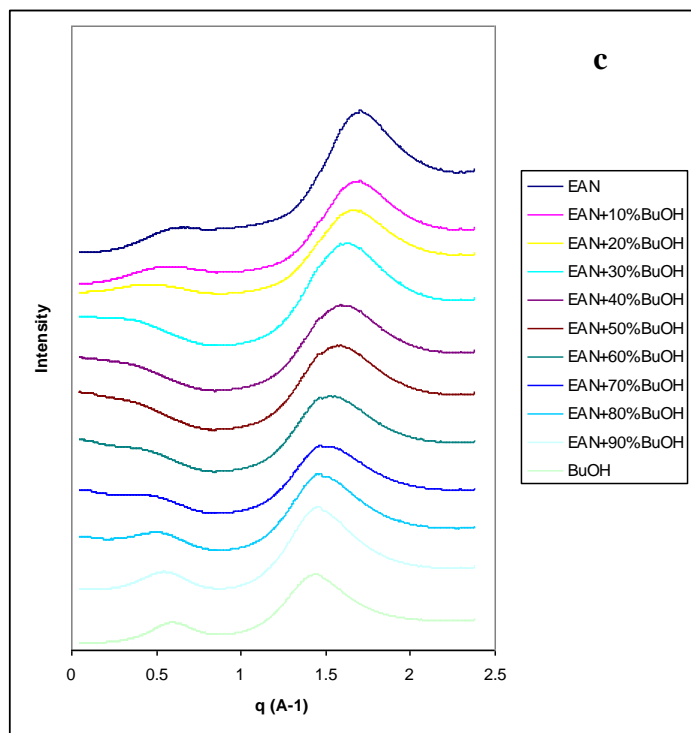

**Figure S1.** SAXS/WAXS patterns for EAN with addition of a) ethanol, b) propanol and c) butanol. Traces have been offset to aid in viewing.

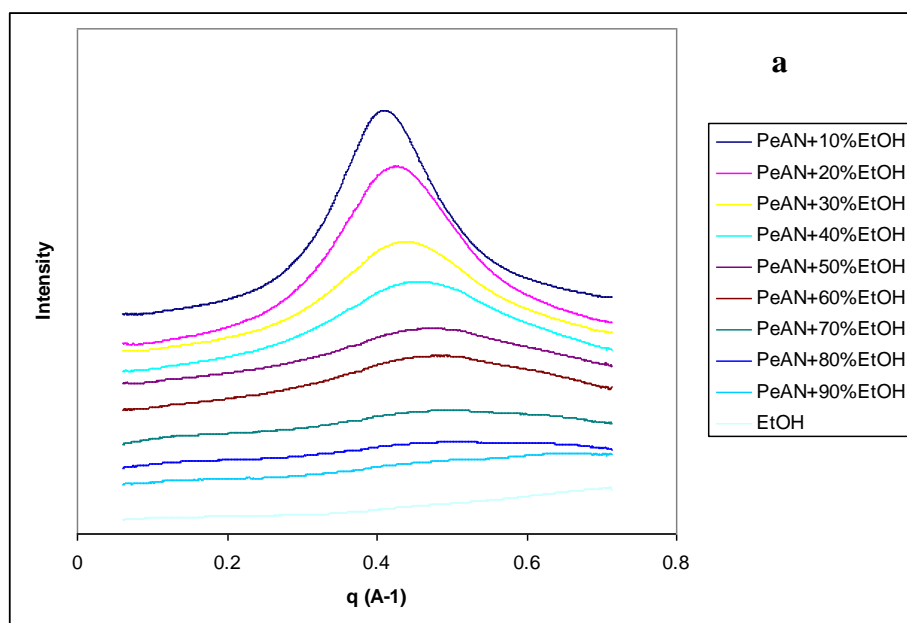

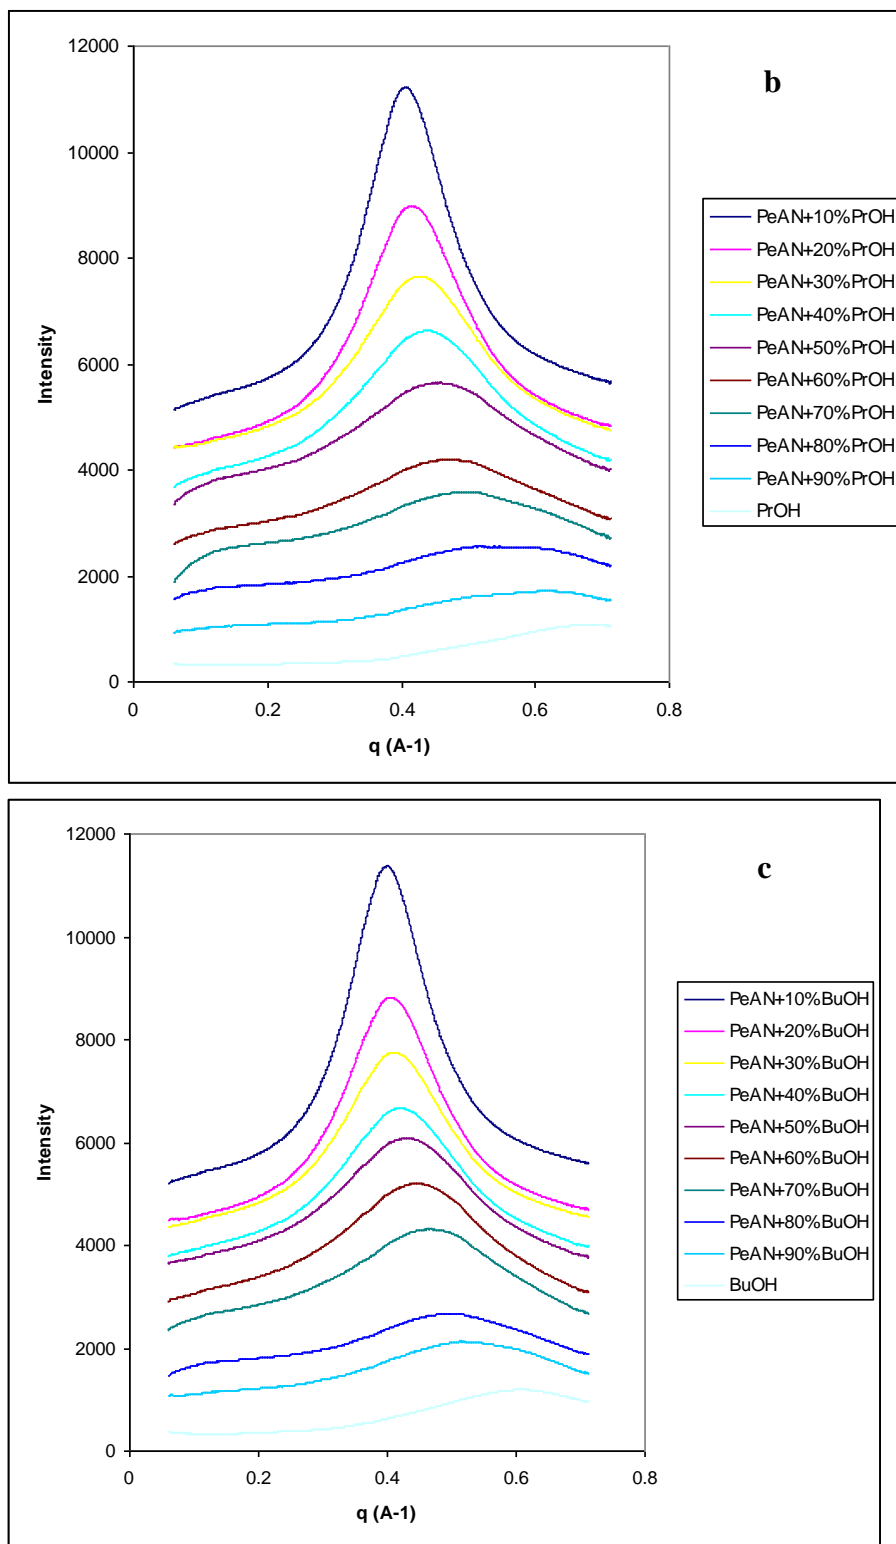

**Figure S2.** SAXS/WAXS patterns for PeAN showing changes to peak 1 with addition of a) ethanol, b) propanol and c) butanol. Traces have been offset to aid in viewing.
